# Supplementary material for: p-Nitrophenol degradation and microbial community structure in a biocathode bioelectrochemical system
Source: Royal Society of Chemistry journal article supplement (doi:10.1039/c6ra17446a), 2016-01-01
Supplement: c6ra17446a1.pdf [file c6ra17446a1.pdf]

## Supplementary materials

The following information is provided to the article in *RSC Advances*

on

**“*p*-Nitrophenol degradation and microbial community structure in  
biocathode bioelectrochemical system”**

Xinyu Wang<sup>a</sup>, Defeng Xing<sup>a\*</sup>, Nanqi Ren<sup>a\*</sup>

<sup>a</sup> State Key Laboratory of Urban Water Resource and Environment, School of  
Municipal and Environmental Engineering, Harbin Institute of Technology, Harbin  
150090, China

\* **Corresponding author.** School of Municipal and Environmental Engineering,  
Harbin Institute of Technology, P.O. Box 2650, 73 Huanghe Road, Nangang District,  
Harbin, Heilongjiang Province 150090, China

E-mail address: dxing@hit.edu.cn; rnq@hit.edu.cn

Tel& Fax: (+86) 451 86289195

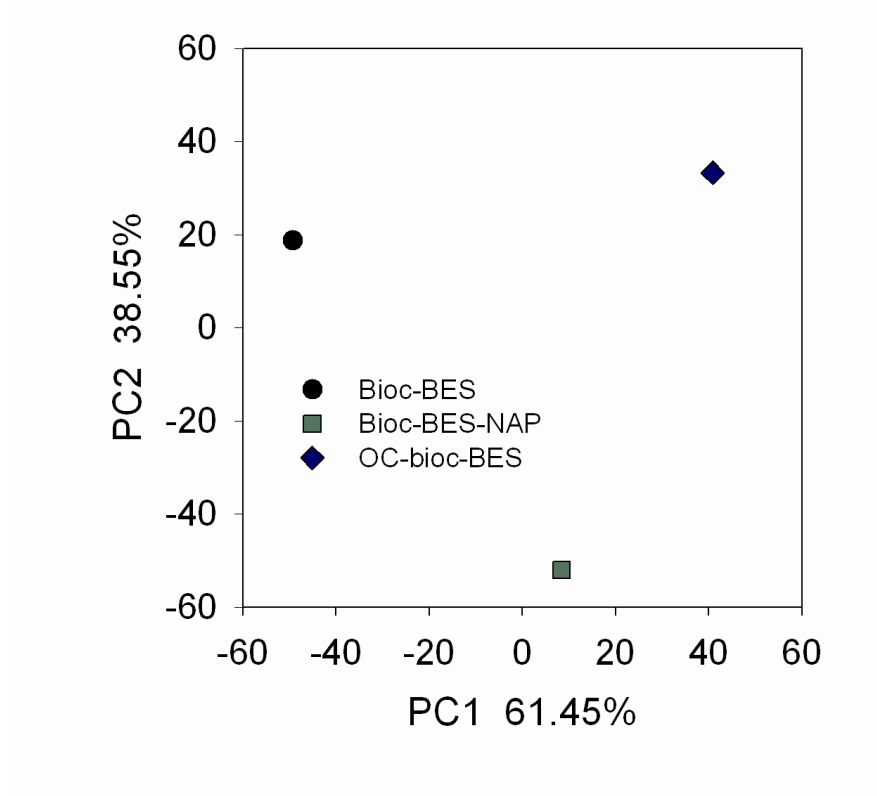

**Fig. S1** The principal component analysis (PCA) based on operational taxonomic units of cathode biofilms in BES

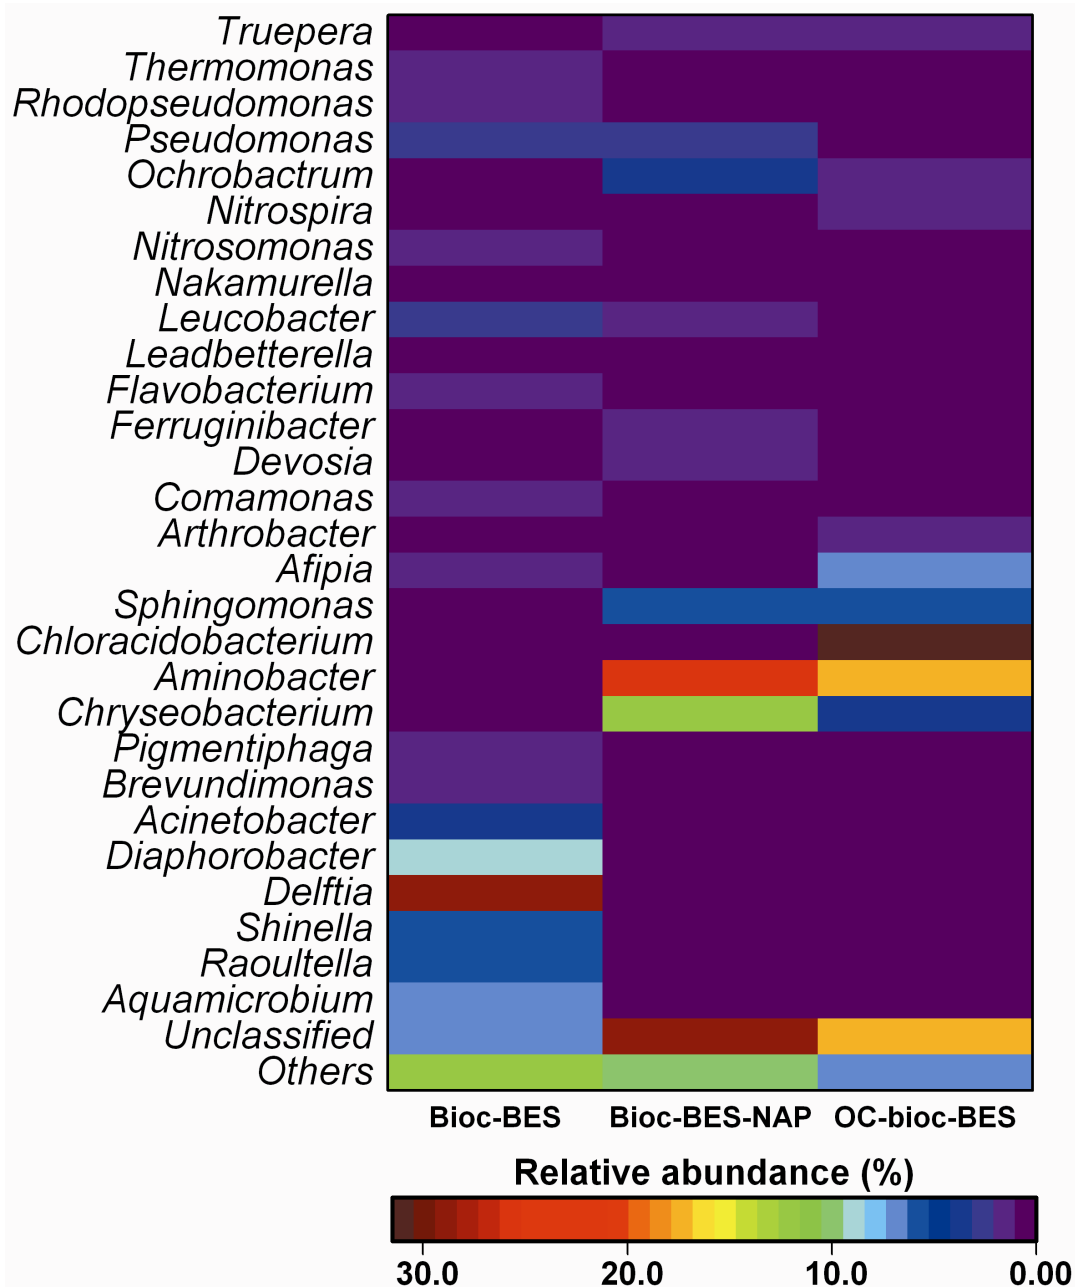

**Fig. S2** The heatmap analysis of bacterial community structures of cathode biofilms in BESs based on 454 pyrosequencing of 16S rRNA gene.
